# Supplementary material for: Ultrastructural pathology of primary ciliary dyskinesia: report about 125 cases in Germany
Source: Diagn Pathol. 2011 Nov 24;6:115. doi: 10.1186/1746-1596-6-115 (PMC3292478; doi:10.1186/1746-1596-6-115)
Supplement: Additional file 1 — Clinical and ultrastructural data of other larger studies. Explanations: S. inv./dex. = Situs inversus/dextrocardia, *combined defects, **with ultrastructural defects, ***according to clinical information. table. [file 1746-1596-6-115-S1.XLS]

## Sheet: Tabelle1
First author	year	country	patients	range (years)	female (%)	S. inv./dex. (%)	I+ODA (%)	ODA (%)	IDA (%)	others (%)
De Iongh RU [11]	1995	Australia	31	0.3-37	?	?	39*	77*	58*	22.6*
Santamaria F [12]	1999	Italy	12	children	?	58.3	58.3	0	16.7	25
Jorissen M [25]	2000	Belgium	60**	?	?	?	68			32
Felix H [13]	2000	Switzerland	10	0.1-55	?	50	100			combined
Noone PG [14]	2004	USA (NC)	76	1-73	53.8	55.1	24	43	29	4
Carlen B [15]	2005	Sweden	38	?	?	36.8	44.8	23.7	21	10.5
Plesec TP [16]	2008	USA (OH)	14	5-49	71.4	35.7	71.4			28.6
Stannard WA [17]	2010	UK	70	0.1-17	48.6	?	32.9	25.7	20	21.4
Papon JF [18]	2010	France	245	0.2-70.4	46	31.8	22.9	42	16.3	18.8
Own study	2011	Germany	125	0.1-50	40.8	21.4***	37.6	4.8	51.2	6.5
